# Supplementary material for: Improved H-adsorption ability of Cu in CuNi alloy nanodots toward the efficient photocatalytic H2-evolution activity of TiO2
Source: Royal Society of Chemistry journal article supplement (doi:10.1039/d2dt02543d), 2022-01-01
Supplement: d2dt02543d1.pdf [file d2dt02543d1.pdf]

## Supporting Information

### **Improved H-adsorption ability of Cu in CuNi alloy nanodots toward the efficient photocatalytic H<sub>2</sub>-evolution activity of TiO<sub>2</sub>**

Meiya Wang,<sup>a</sup> Ping Wang,<sup>a\*</sup> Haoyu Long,<sup>a</sup> Xuefei Wang,<sup>a</sup> FengChen,<sup>a</sup> Huogen  
Yu<sup>a,b\*</sup>

<sup>a</sup> School of Materials Science and Engineering, and School of Chemistry, Chemical  
Engineering and Life Sciences, Wuhan University of Technology, Wuhan 430070, PR  
China

<sup>b</sup> Laboratory of Solar Fuel, Faculty of Materials Science and Chemistry, China  
University of Geosciences, Wuhan, 430074, PR China

\*Corresponding authors. Tel: +86(27)87749379;

E-mail: wangping0904@whut.edu.cn (Ping Wang);

huogenyu@163.com (Huogen Yu)

### **SI-1 Materials**

Commercial Degussa TiO<sub>2</sub> nanoparticles (P25), CuCl<sub>2</sub>·2H<sub>2</sub>O, NiCl<sub>2</sub>·6H<sub>2</sub>O, and C<sub>2</sub>H<sub>5</sub>OH came from Shanghai Chemical Reagent Ltd. and anatase TiO<sub>2</sub> (25 nm) came from Shanghai Macklin Biochemical Co., Ltd. GO was prepared via a similar method to Hummer's consisted with our prior study <sup>33</sup>.

### **SI-2 Characterization**

The transmission electron microscope (TEM) (JEM-2100F, JEOL, Japan), X-ray diffractometer (XRD) (Rigaku, D/MX- IIIA, Japan), Raman microscope (In Via, Renishaw, UK), X-ray photoelectron spectroscopy (XPS) (Thermo Fisher, ESCALAB 250Xi, USA), UV-vis spectrophotometer (UV-2450, Shimadzu, Japan), and *in-situ* X-ray photoelectron spectrometer (ESCALAB 210, VG Scientific, UK) were used to confirm the microstructures of the as-prepared samples. The practical proportion of Cu and Ni in the samples was detected by the inductively coupled plasma optical emission spectrometer (ICP-OES) (Prodigy 7, LEEMAN LABS, USA).

### **SI-3 Photocatalytic H<sub>2</sub>-evolution measurement**

The photocatalytic system (prepared photocatalysts in ethanol solution) (Section 2) was directly applied in photocatalytic H<sub>2</sub>-generation tests. Briefly, the above suspension was purged with nitrogen for 15 min to remove extra gases, then directly radiated by a 365 nm-LED lamp (150 W) to generate H<sub>2</sub>. After irradiation for 1 h, 0.4 mL of gas was detected by a gas chromatograph (Shimadzu GC-2014C, Japan, with nitrogen as carrier gas) equipped with a 5 Å molecular sieve column and a thermal

conductivity detector every hour intervals during another 3 hours irradiation. Finally, the H<sub>2</sub>-evolution rate was obtained by fitting the measured hydrogen-peak data. The corresponding apparent quantum efficiency (AQE) was calculated with the following equation:

$$\begin{aligned} \text{AQE(\%)} &= \frac{\text{number of reacted electrons}}{\text{number of incident photons}} \times 100 \\ &= \frac{\text{number of evolved H}_2 \text{ molecules} \times 2}{\text{number of incident photons}} \times 100 \end{aligned} \quad (\text{S1})$$

#### **SI-4 Photoelectrochemical measurements**

All photoelectrochemical properties are measured on a CHI660E electrochemical workstation (Chenhua Instrument, China) in a three-electrode configuration cell using Ag/AgCl, as-prepared sample-modified FTO glass, and Pt wire under the Na<sub>2</sub>SO<sub>4</sub> solution (0.5 mol L<sup>-1</sup>). The preparation of the working electrode referred to our previous work.<sup>R[2]</sup> Linear sweep voltammogram (LSV) curves were collected in the potential range from -0.8 V to -1.3 V at a scan rate of 10 mV s<sup>-1</sup>. Transient photocurrent responses with time (*i-t*) curves were detected at 0.5 V bias potential under 3W-LED (365 nm). The electrochemical impedance spectroscopy (EIS) data were fitted according to those at open-circuit voltage with a frequency range of 10<sup>-3</sup>-10<sup>6</sup> Hz and an ac amplitude of 10 mV.

#### **SI-5 DFT computational methods**

The first principle calculation were carried out by using the Vienna Ab initio Simulation Package (VASP). Generalized gradient approximation (GGA) with

Perdew-Burke-Ernzerhof (PBE) functional was selected to describe the exchange-correlation interaction. The energy cutoff and Monkhorst-Pack k-point meshes were set as 450 eV and  $3 \times 3 \times 1$ , respectively. The convergence threshold was set as  $10^{-5}$  eV for energy and  $0.01 \text{ eV} \cdot \text{\AA}^{-1}$  for force. To eliminate interactions between periodic structures, a vacuum of  $20 \text{ \AA}$  was added. The Gibbs free energy of H atom adsorption ( $\Delta G_{H^*}$ ) was defined as following equation:

$$\Delta G_H = \Delta E_H + \Delta E_{ZPE} - T\Delta S_H \quad (\text{S2})$$

where  $\Delta E_H$ ,  $\Delta E_{ZPE}$ ,  $T\Delta S_H$  are the differential hydrogen  $\Delta E_H$  adsorption energy, the change in zero point energy and entropy between the adsorbed hydrogen and molecular hydrogen in gas phase, respectively, and  $T$  is the temperature. The term  $T\Delta S_H$  was calculated to be -0.2 eV. To simulate the alloy structure of CuNi, the CuNi alloy model was constructed by replacing one Cu atom with one Ni atom on (100) facet of Cu.

## Figure captions

**Fig. S1.** The photocatalytic H<sub>2</sub>-evolution rate of CuNi-rGO/TiO<sub>2</sub> photocatalyst in (a) ethanol solution (25 vol%) and (b) pure water.

**Fig. S2.** The photocatalytic H<sub>2</sub>-evolution rate of CuNi-rGO/TiO<sub>2</sub> photocatalyst under (a) 365 nm and (b) 420 nm wavelength.

**Fig. S3.** The photocatalytic H<sub>2</sub>-evolution rate of (a) TiO<sub>2</sub>(P25), (a') CuNi-rGO/TiO<sub>2</sub>, (b) anatase TiO<sub>2</sub>, (b') CuNi-rGO/anatase TiO<sub>2</sub>, (c) CdS, and (c') CuNi-rGO/CdS.

**Table S1.** The application of rGO and metal in the field of photocatalysis.

| Photocatalyst                              | Method          | Light source               | Sacrificial agent  | H <sub>2</sub> -production rate (mmol h <sup>-1</sup> g <sup>-1</sup> ) | Ref.      |
|--------------------------------------------|-----------------|----------------------------|--------------------|-------------------------------------------------------------------------|-----------|
| TiO <sub>2</sub> -rGO-Pt                   | photodeposition | mercury-vapor lamp (450 W) | methanol (10 vol%) | 567                                                                     | 15        |
| Au-TiO <sub>2</sub> -rGO                   | hydrothermal    | LED (3W)                   | methanol (25 vol%) | 0.30                                                                    | 16        |
| Au-Pd/rGO/TiO <sub>2</sub>                 | hydrothermal    | Xe (300 W)                 | methanol (25 vol%) | 0.50                                                                    | 17        |
| Pt-rGO-TiO <sub>2</sub>                    | hydrothermal    | PL-S (9W)                  | methanol (20 vol%) | 0.51 (16 times)                                                         | R1        |
| P25-rGO-Co                                 | hydrothermal    | mercury lamp (250 W)       | methanol (20 vol%) | 3.80 (32 times)                                                         | R2        |
| Pt-GN-TiO <sub>2</sub>                     | photodeposition | mercury-vapor lamp (8 W)   | methanol (10 vol%) | 6.58                                                                    | R3        |
| Pt-RGO/TiO <sub>2</sub>                    | photodeposition | Xe (500 W)                 | methanol (25 vol%) | 0.88 (1.6 times)                                                        | R4        |
| Pt-RGO-TiO <sub>2</sub>                    | hydrothermal    | mercury lamp               | methanol           | 1.99                                                                    | R5        |
|                                            | photodeposition | (8 W)                      | (10 vol%)          |                                                                         |           |
| Sr <sup>2+</sup> /Ag-TiO <sub>2</sub> @rGO | hydrothermal    | Xe (250 W)                 | TEOA (10 vol%)     | 0.64                                                                    | R6        |
| CuNi-rGO/TiO <sub>2</sub>                  | photodeposition | LED (150 W)                | ethanol (25 vol%)  | 10.41 (53.7 times)                                                      | This work |

15. M. A. Esteves, F. Fresno, V. R. Fernandes, F. E. Oropeza, V. A. de la Peña O'Shea and C. M. Rangel, *Catal. Today*, 2021, 380, 41-52.

- 16.** Y. Wang, J. Yu, W. Xiao and Q. Li, *J. Mater. Chem. A*, 2014, 2, 3847-3855.
- 17.** B. Tudu, N. Nalajala, P. R. K, P. Saikia and C. S. Gopinath, *ACS Appl. Mater. Interfaces*, 2019, 11, 32869-32878.
- R1.** M. J. Rivero, O. Iglesias, P. Ribao and I. Ortiz, *Int. J. Hydrogen Energy*, 2019, 44, 101-109.
- R2.** S. Min, F. Wang and G. Lu, *Catal. Commun.*, 2016, 80, 28-32.
- R3.** N. T. Nguyen, D. D. Zheng, S. S. Chen and C. T. Chang, *J Nanosci Nano.*, 2018, 18, 48-55.
- R4.** H. Li and X. Cui, *Int. J. Hydrogen Energy*, 2014, 39, 19877-19886.
- R5.** Y. Shinde, S. Wadhai, A. Ponkshe, S. Kapoor and P. Thakur, *Int. J. Hydrogen Energy*, 2018, 43, 4015-4027.
- R6.** X. Wei, J. Cao and F. Fang, *RSC Adv*, 2018, 8, 31822-31829.

**Table S2.** The ICP-OES results of the CuNi-rGO/TiO<sub>2</sub> samples.

| Samples                                  | Cu (wt%) | Ni (wt%) | Actual molar<br>ratio of Cu to<br>Ni | Actual molar<br>ratio of CuNi to<br>TiO <sub>2</sub> (at%) | Actual ratio of<br>CuNi toTiO <sub>2</sub><br>(wt%) |
|------------------------------------------|----------|----------|--------------------------------------|------------------------------------------------------------|-----------------------------------------------------|
| CuNi-<br>rGO/TiO <sub>2</sub><br>(1 wt%) | 0.043    | 0.003    | 15                                   | 0.165                                                      | 0.13                                                |
| CuNi-<br>rGO/TiO <sub>2</sub><br>(5 wt%) | 1.114    | 0.059    | 17                                   | 1.514                                                      | 1.2                                                 |

**Table S3.** The photocatalytic H<sub>2</sub>-evolution rate and apparent quantum efficiency (AQE) of various samples.

| Samples                         | H <sub>2</sub> evolution rate<br>( $\mu\text{mol h}^{-1} \text{g}^{-1}$ ) | AQE (%) |
|---------------------------------|---------------------------------------------------------------------------|---------|
| TiO <sub>2</sub>                | 194                                                                       | 0.08    |
| rGO/TiO <sub>2</sub>            | 269                                                                       | 0.11    |
| Cu-rGO/TiO <sub>2</sub>         | 5924                                                                      | 2.50    |
| CuNi-rGO/TiO <sub>2</sub> (1:4) | 7492                                                                      | 3.16    |
| CuNi-rGO/TiO <sub>2</sub> (2:3) | 10411                                                                     | 4.39    |
| (CuNi-rGO/TiO <sub>2</sub> )    |                                                                           |         |
| CuNi-rGO/TiO <sub>2</sub> (3:2) | 7651                                                                      | 3.23    |
| CuNi-rGO/TiO <sub>2</sub> (4:1) | 6372                                                                      | 2.69    |
| Ni-rGO/TiO <sub>2</sub>         | 4673                                                                      | 1.97    |

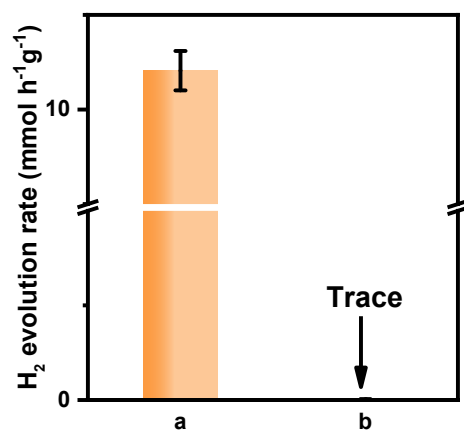

**Fig. S1.** The photocatalytic H<sub>2</sub>-evolution rate of CuNi-rGO/TiO<sub>2</sub> photocatalyst in (a) ethanol solution (25 vol%) and (b) pure water.

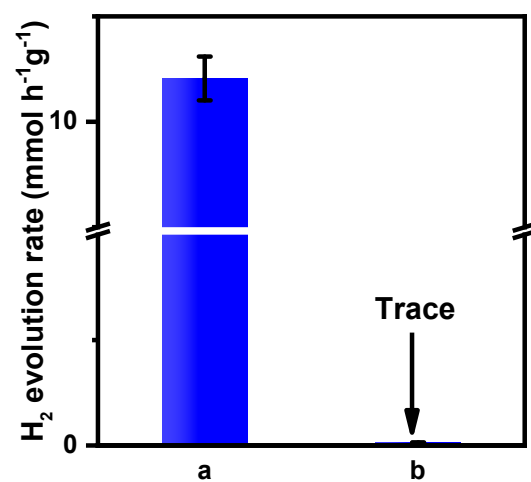

**Fig. S2.** The photocatalytic H<sub>2</sub>-evolution rate of CuNi-rGO/TiO<sub>2</sub> photocatalyst under (a) 365 nm and (b) 420 nm wavelength.

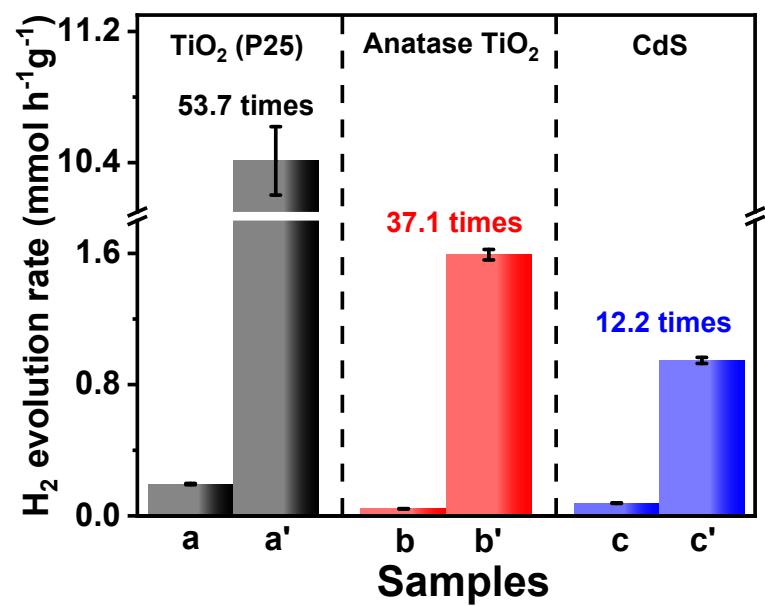

**Fig. S3.** The photocatalytic H<sub>2</sub>-evolution rate of (a) TiO<sub>2</sub>(P25), (a') CuNi-rGO/TiO<sub>2</sub>, (b) anatase TiO<sub>2</sub>, (b') CuNi-rGO/anatase TiO<sub>2</sub>, (c) CdS, and (c') CuNi-rGO/CdS.
